# Supplementary material
Source: PubMed Central journal article supplement (PMC3595483)

# Supplementary Figure 1

**a**

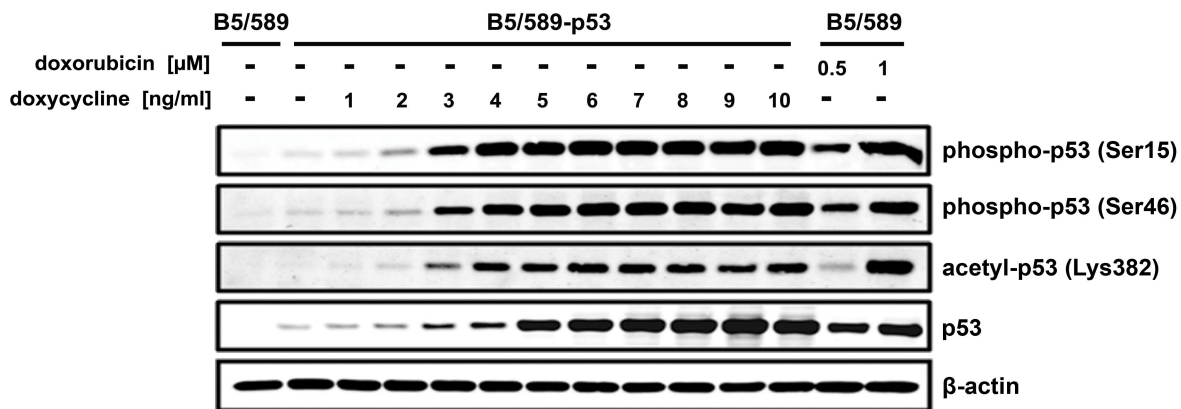

**b**

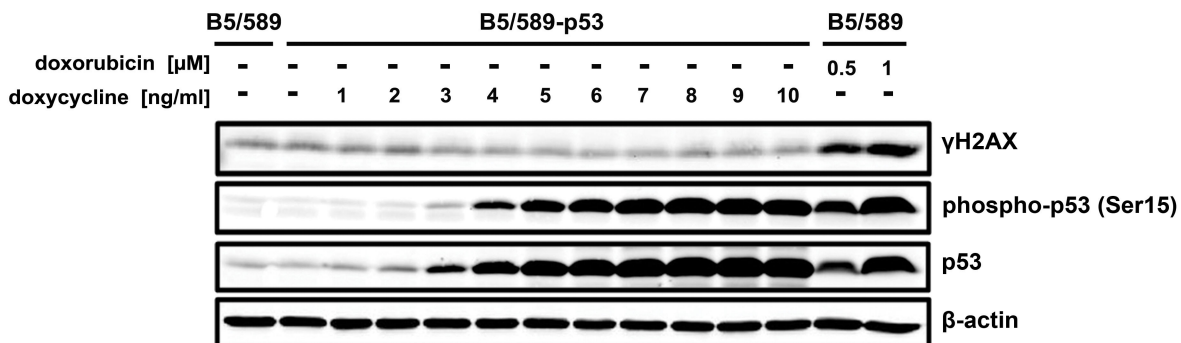

**c**

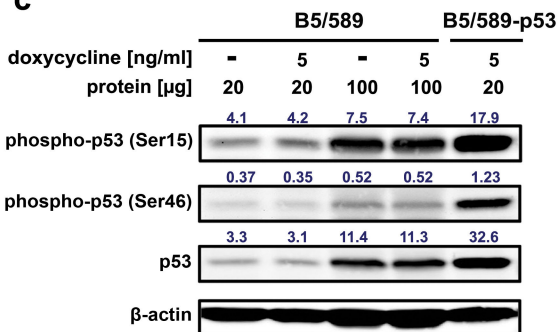

**d**

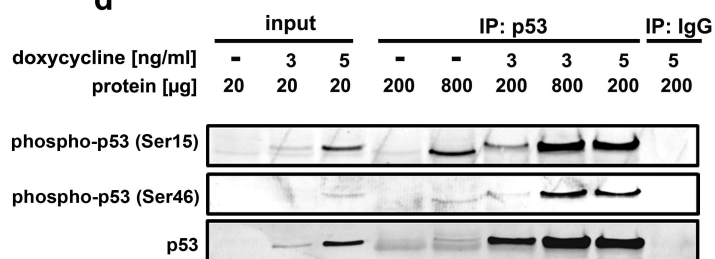

**e**

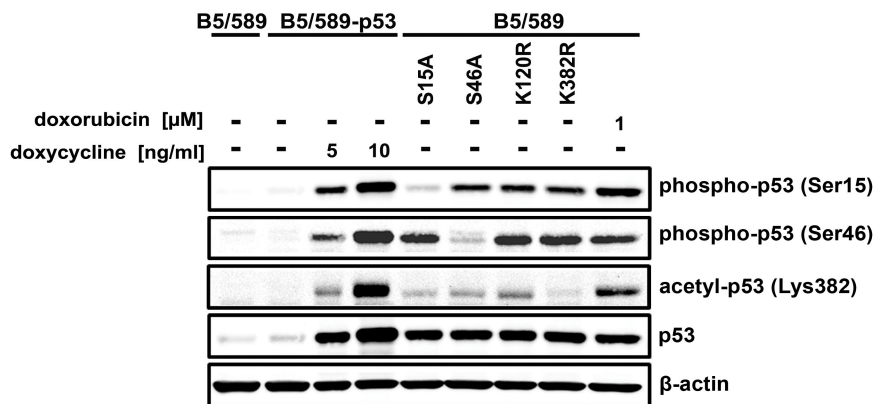

# Supplementary Figure 2

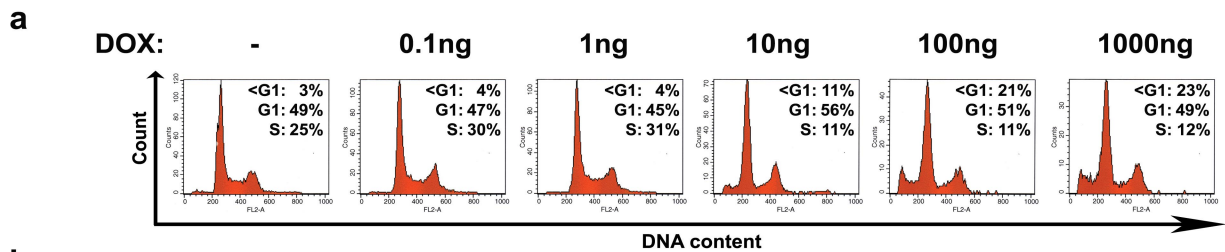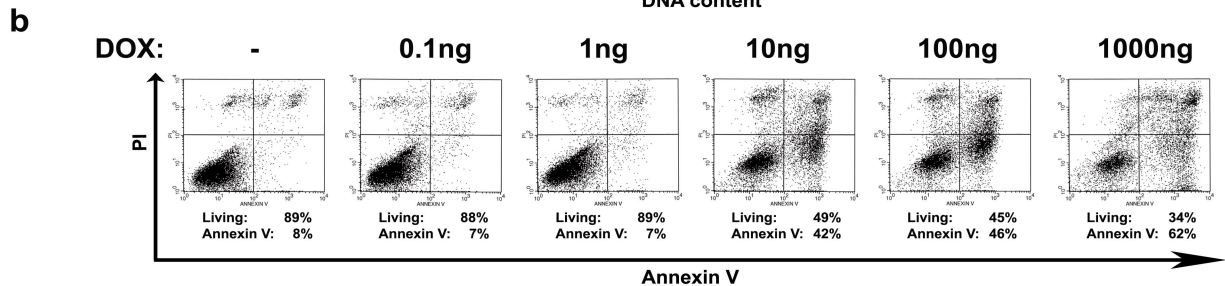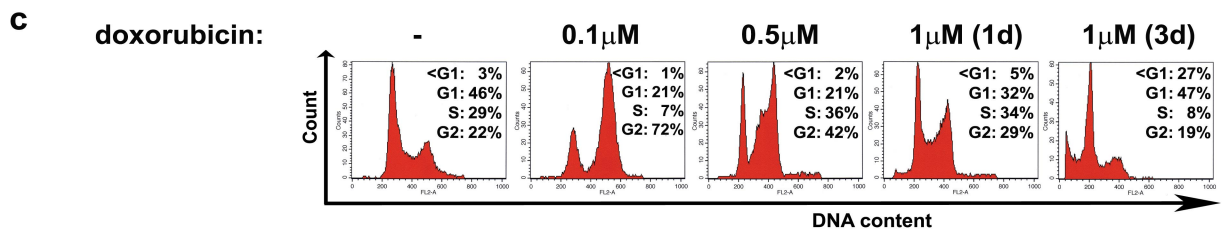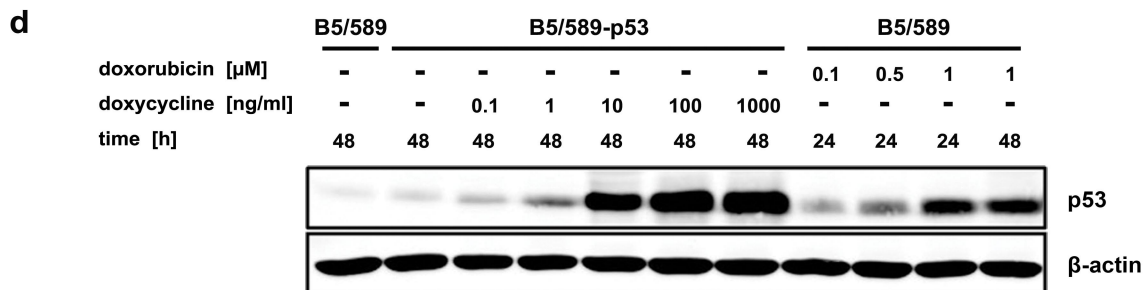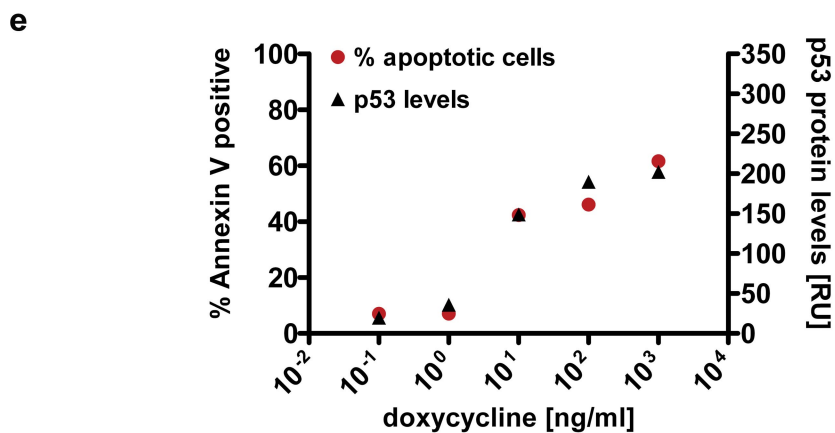

Supplementary Figure 3

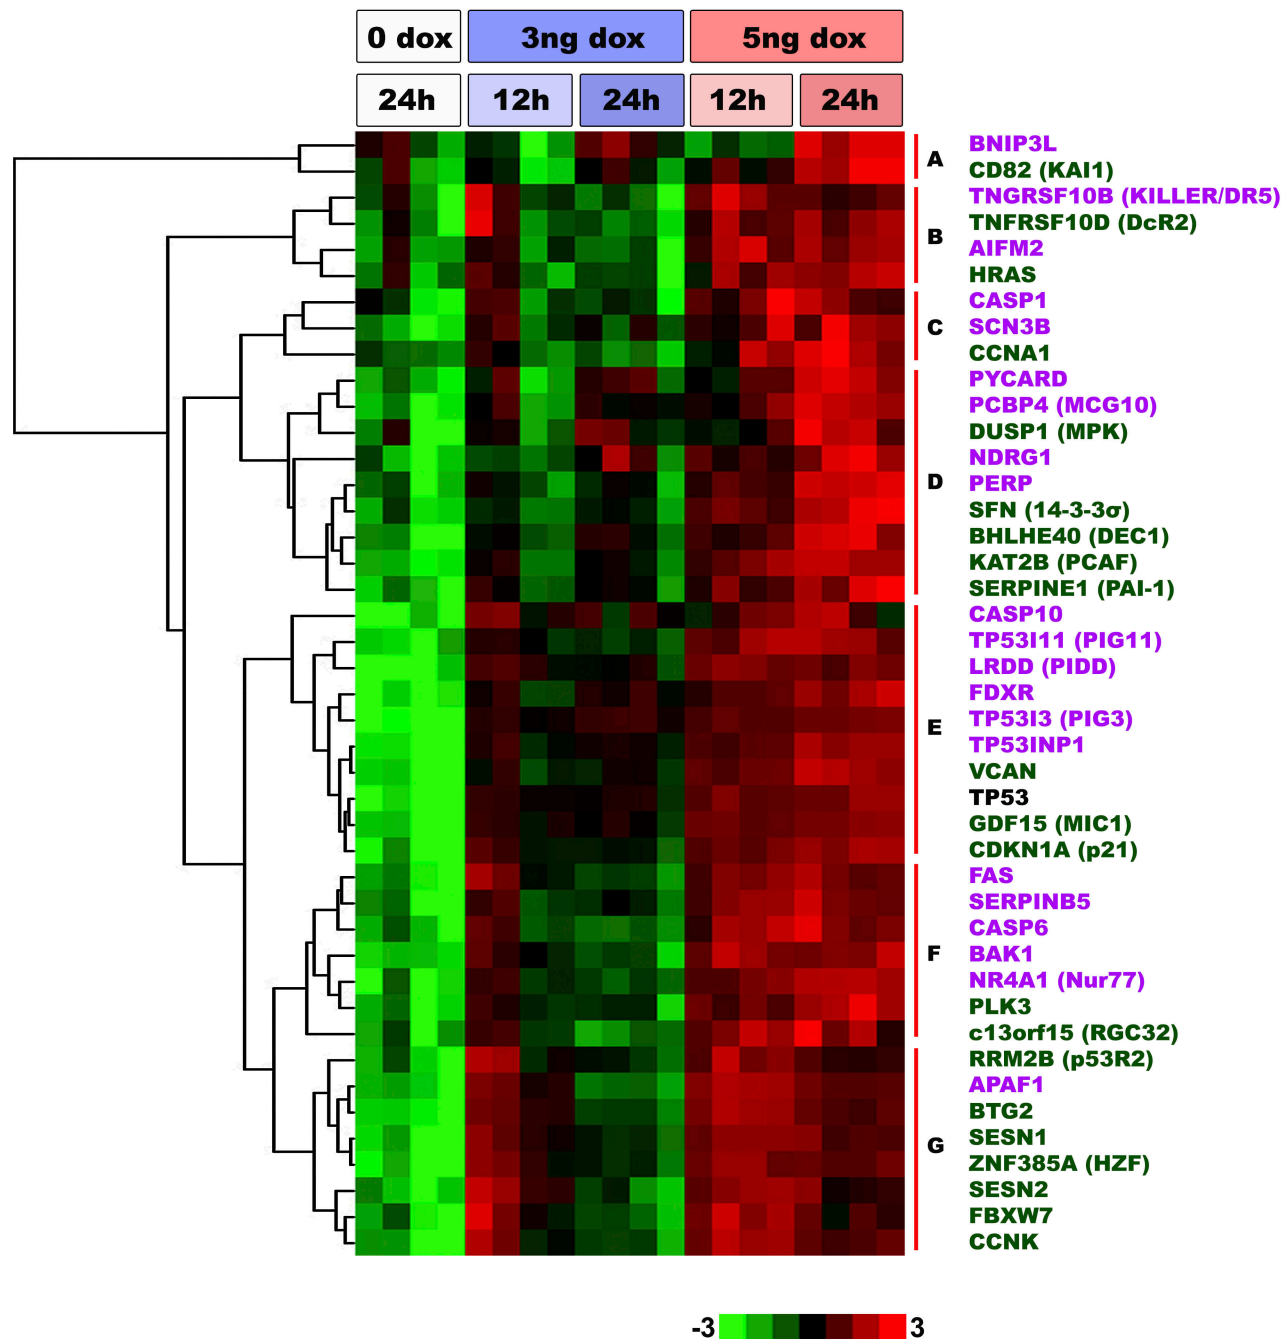

# Supplementary Figure 4

**a**

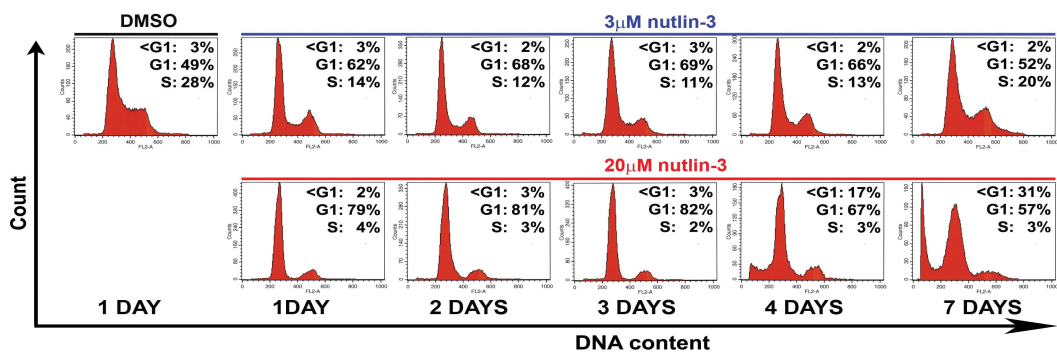

**b**

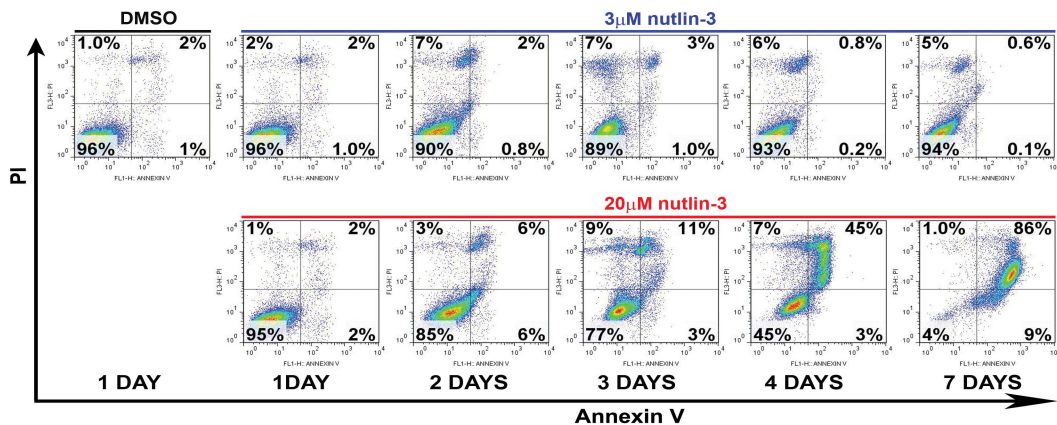

**c**

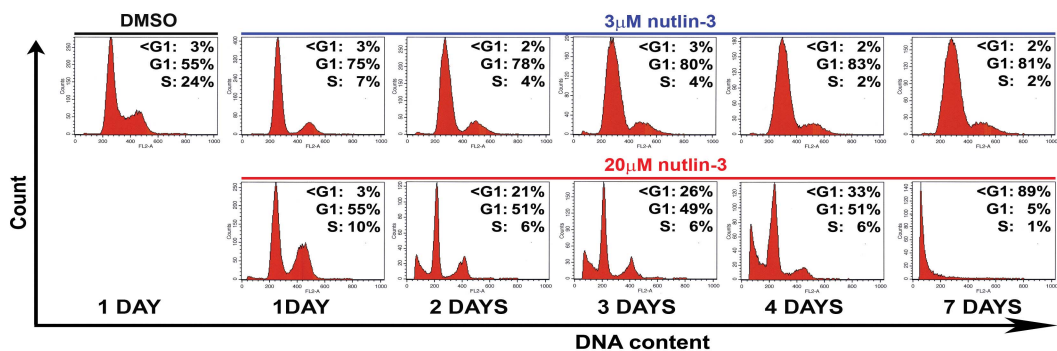

**d**

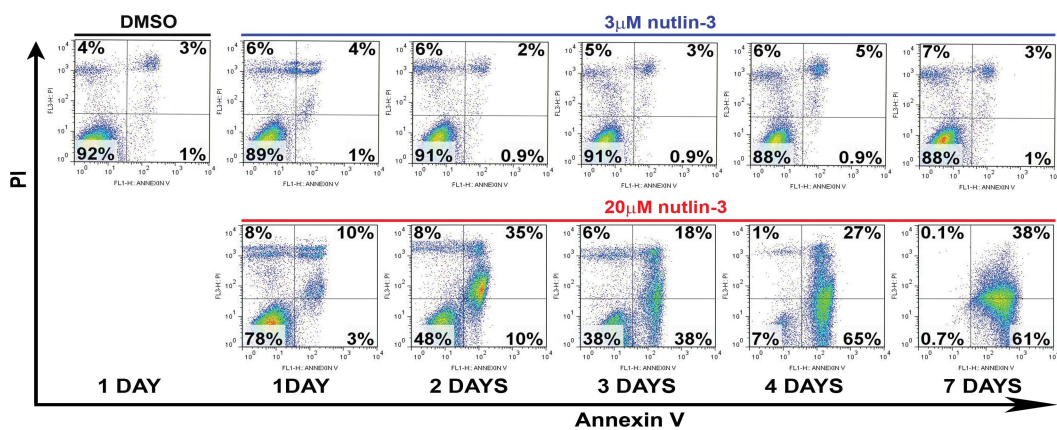

parental B5/589 cells

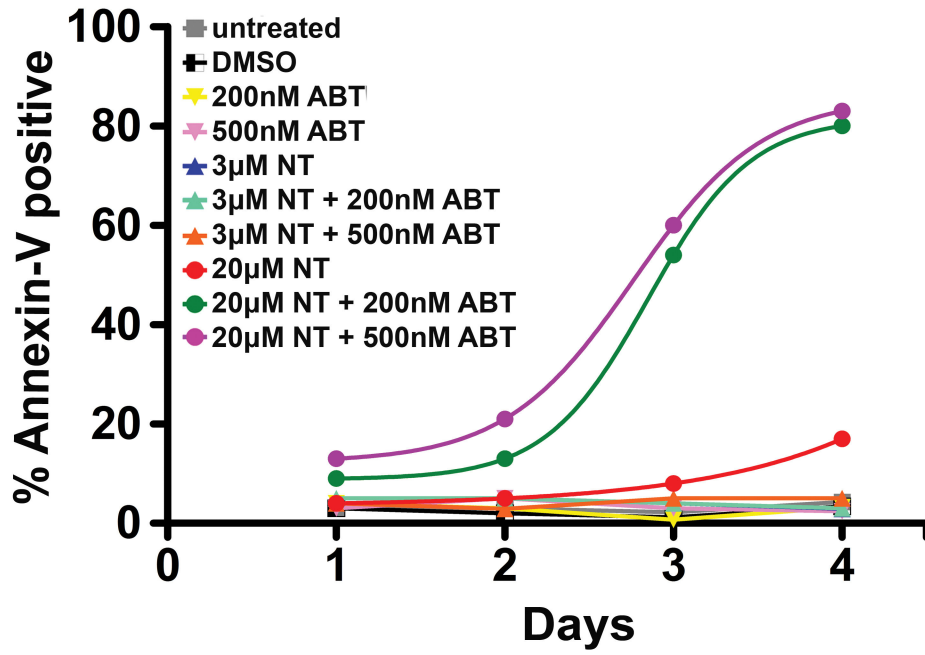

Supplementary Figure 6

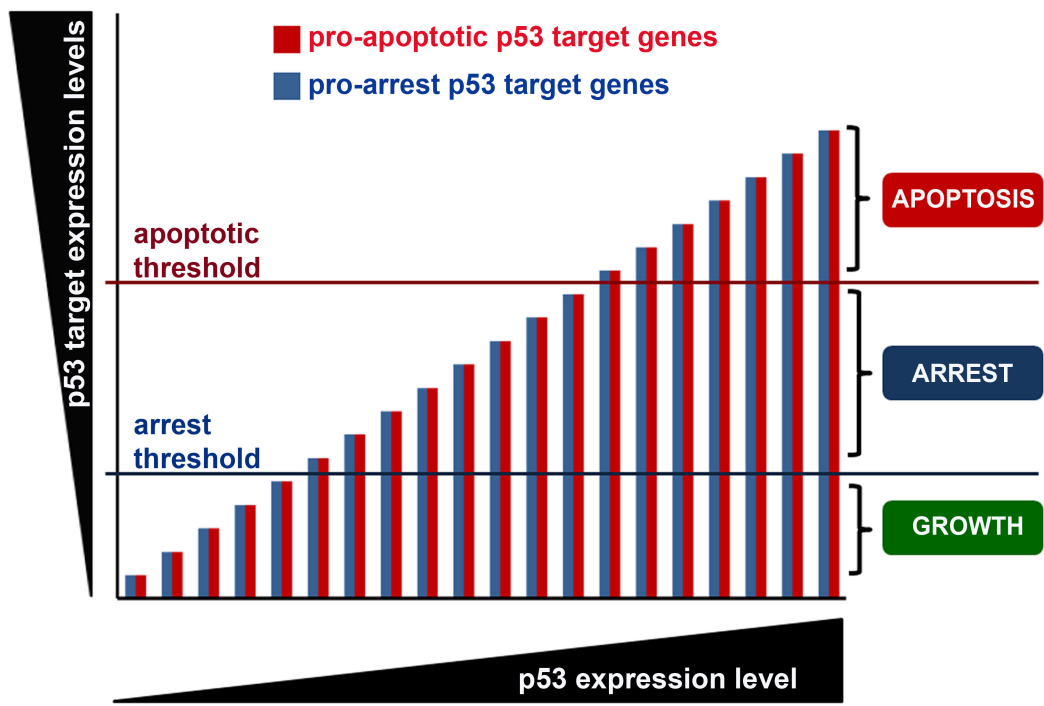

Supplement: cdd2012155x1.pdf [file cdd2012155x1.pdf]
